# Supplementary material for: Galvanic cell reaction driven electrochemical doping of TiO2 nanotube photoanodes for enhanced charge separation
Source: Royal Society of Chemistry journal article supplement (doi:10.1039/c8cc06044d), 2018-01-01
Supplement: c8cc06044d1.pdf [file c8cc06044d1.pdf]

## Supporting Information

### Galvanic cell reaction driven electrochemically doping of TiO<sub>2</sub> nanotube photoanodes for enhanced charge separation

Heng Zhu,<sup>a</sup> Yingfei Hu,<sup>a</sup> Kai Zhu,<sup>b</sup> Shicheng Yan,<sup>\*a</sup> Lei Lu,<sup>a</sup> Meiming Zhao,<sup>a</sup> Hongwei Fu,<sup>a</sup> Zhaosheng Li<sup>a</sup> and Zhigang Zou<sup>a,c</sup>

<sup>a</sup> Eco-Materials and Renewable Energy Research Center (ERERC), Collaborative Innovation Center of Advanced Microstructures, College of Engineering and Applied Sciences, Nanjing University, No. 22, Hankou Road, Nanjing, Jiangsu, 210093, PR China. E-mail: yscfei@nju.edu.cn.

<sup>b</sup> School of Information Science and Engineering, Nanjing University Jinling College, No. 8, Xuefu Road, Nanjing, Jiangsu 210089, P. R. China

<sup>c</sup> National Laboratory of Solid State Microstructures, Department of Physics, Nanjing University, No. 22, Hankou Road, Nanjing, Jiangsu, 210093, PR China

## Experiment Methods

**Preparation of TiO<sub>2</sub> nanotube array electrodes.** The electrochemical anodic oxidation method was used to fabricate the TiO<sub>2</sub> nanotube arrays film.<sup>1</sup> To remove the surface oxidation layer, the titanium sheet (0.2 mm thickness, 99.5% purity) was first chemically polished in the solution containing HF, HNO<sub>3</sub>, and deionized water (1:2:7 in volume) for 30 s. The resulting titanium sheets were ultrasonically cleaned with acetone, ethanol, and deionized water, and then were anodized in 250 mL NH<sub>4</sub>F-containing ethylene glycol (EG) solution (1g NH<sub>4</sub>F, 245 mL EG, 5mL deionized water) at 60 V for 15 min at room temperature and the counter electrode was a platinum plate. The as-anodized samples were thoroughly cleaned with deionized water and then annealed in air at 450 °C for 2 h with a heating rate of 10 °C min<sup>-1</sup>.

**NaBH<sub>4</sub> treatment.** The conductor parts of the as obtained sample where no nanotubes grown were polished with sandpaper to remove the TiO<sub>2</sub> compact layer on the surface of Ti sheet formed during heat treatment. The one that whole sample including nanotubes and conductor parts was immersed in 0.5 M NaBH<sub>4</sub> solution (W-TiO<sub>2</sub>). The other one the conductor parts on the back and front of the photoanode were thoroughly sealed by insulating tape and only nanotubes on the sample can contact NaBH<sub>4</sub> electrolyte (O-TiO<sub>2</sub>). For comparison, commercial anatase TiO<sub>2</sub> nano powders (0.1 g) were added to 50 mL 0.5 M NaBH<sub>4</sub> solution under magnetic stirring for a relative long time 3 h at room temperature.

**Electrochemical doping.** The TiO<sub>2</sub> nanotubes electrode as the working electrode were immersed in 1 M NaOH solution. Then a negative bias -1.35 V was applied in the dark at room temperature for 10 ~ 60 s.<sup>2</sup>

**TiO<sub>2</sub> nanotube array characterizations.** The morphologies of the TiO<sub>2</sub> nanotube photoanodes were observed by field-emission scanning electron microscope (FE-SEM; Nova NanoSEM 230, FEI). Crystal phases of these samples were determined using an X-ray

diffractometer (XRD, Rigaku Ultima III, Japan) operated at 40 kV and 40 mA using Cu K $\alpha$  radiation. X-ray photoelectron spectroscopy (XPS) measurements were carried out on a Thermo VG Scientific ESCALAB 250 spectrometer with monochromatized Al K $\alpha$  excitation. The spectral positions were corrected by normalizing the C1s spectrum at 284.6 eV, and a Shirley background was used for peak fitting. The UV-Vis absorption spectra were obtained by ultraviolet-visible spectrophotometer (UV, Shimadzu UV-2550). Electron paramagnetic resonance (EPR) was conducted with an X-band EPR spectrometer (EMX-10/12, Bruker, German) operating at a microwave frequency of 9.49 GHz at 110 K.

**Electrochemical and photoelectrochemical characterization.** A CHI760E electrochemical workstation (Shanghai Chenhua Company, Shanghai, China) was used to conduct the electrochemical and photoelectrochemical measurements, which were performed in a standard three-electrode cell at room temperature. The electrode except the semiconductor-electrolyte interface was thoroughly sealed with silica gel or black insulating tape. A platinum plate and saturated Ag/AgCl were used as counter and reference electrodes, respectively. All the potentials are described by referring to the Ag/AgCl reference electrode. A 500 W Xe lamp was used as the light source for photocurrent measurements. The irradiated area was circular with area of 0.28 cm<sup>2</sup> and photocurrent densities were normalized to 1 cm<sup>2</sup>. Oxidation–reduction potential was measured by open circuit potential (OCP) mode. Mott-Schottky curves were measured using an electrochemical analyzer (2273, Princeton Applied Research, AMETEK, USA). The electrochemical impedance spectra (EIS) were measured using an electrochemical analyzer (Solartron 1260 + 1287, AMETEK, USA) with a 10 mV amplitude perturbation and frequencies between 100 kHz and 0.1 Hz

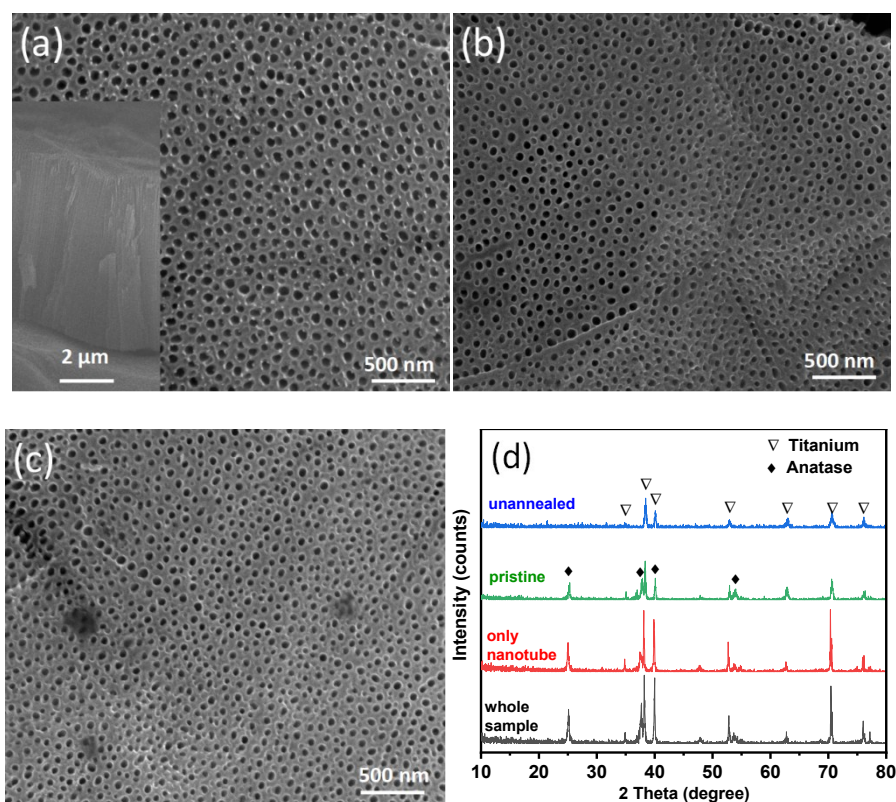

**Fig. S1** SEM images of TiO<sub>2</sub> nanotube array electrode. (a) The as-obtained sample. The inset shows a cross-section SEM image. (b) W-TiO<sub>2</sub> electrode after immersing in NaBH<sub>4</sub> for 1 h. (c) O-TiO<sub>2</sub> electrode after immersing in NaBH<sub>4</sub> for 1 h. (d) XRD patterns. The sample after anodic oxidation (blue line) and after annealing (green line) in air at 450 °C for 2 h, the TiO<sub>2</sub> nanotube electrode after NaBH<sub>4</sub> treatment for 1 h, O-TiO<sub>2</sub> (red line) and W-TiO<sub>2</sub> (black line).

The samples obtained by anodic oxidation without annealing in air is essentially amorphous because all the diffraction peaks are assigned to Ti substrate. After heating in air at 450 °C for 2 h, the amorphous film became crystallized single-phase TiO<sub>2</sub> with anatase structure (JCPDS Card No. 21-1272). Morphology and structural properties of the samples were almost no varied after NaBH<sub>4</sub> treatment.

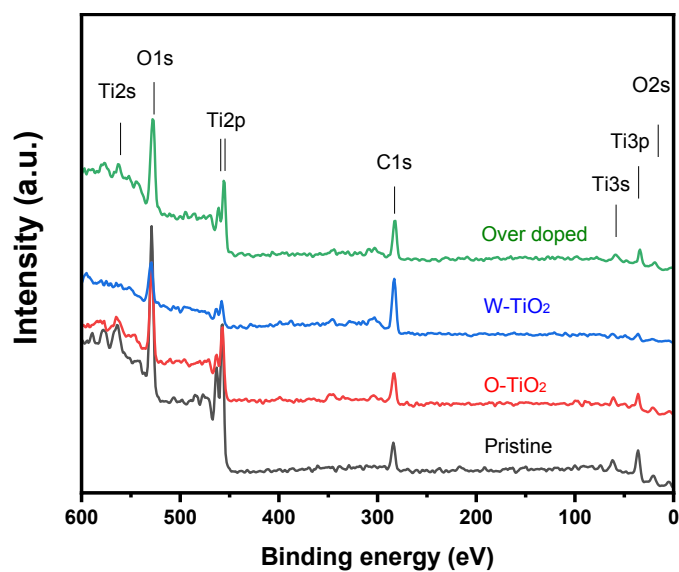

**Fig. S2** Wide XPS spectrum. The pristine  $\text{TiO}_2$  nanotube photoanodes,  $\text{O-TiO}_2$ ,  $\text{W-TiO}_2$  and electrode electrochemical over doped in aqueous 1 M NaOH at -1.75 V 90 s.

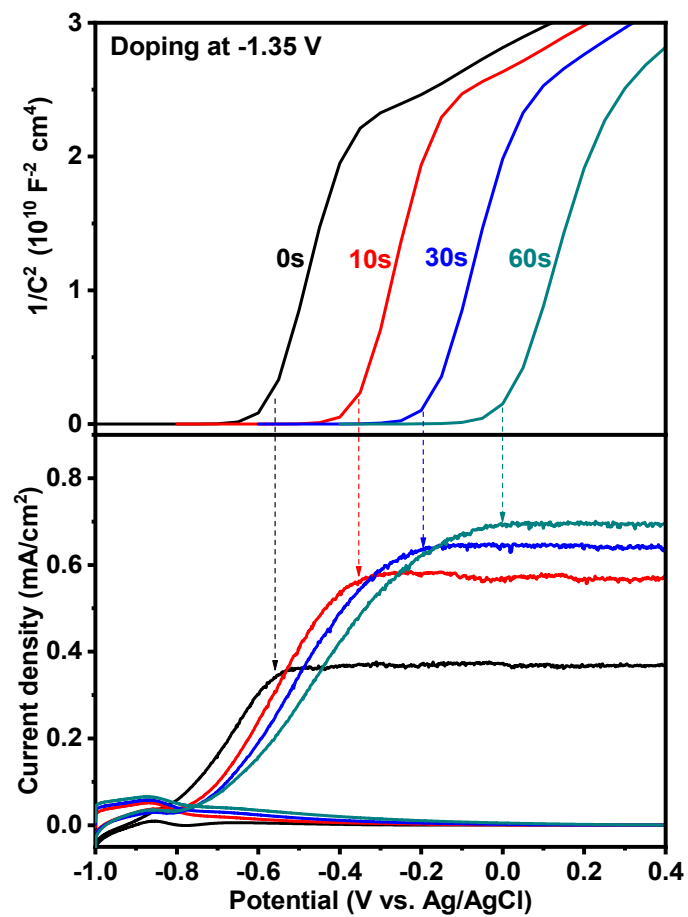

**Fig. S3** The correlation of Mott-Schottky plots (top) and photocurrent density curves (bottom) of  $\text{TiO}_2$  nanotubes electrode after electrochemical doping in 1 M NaOH solution at -1.35 V for 0, 10, 30, and 60 s. Scan rate:  $20 \text{ mV s}^{-1,2}$

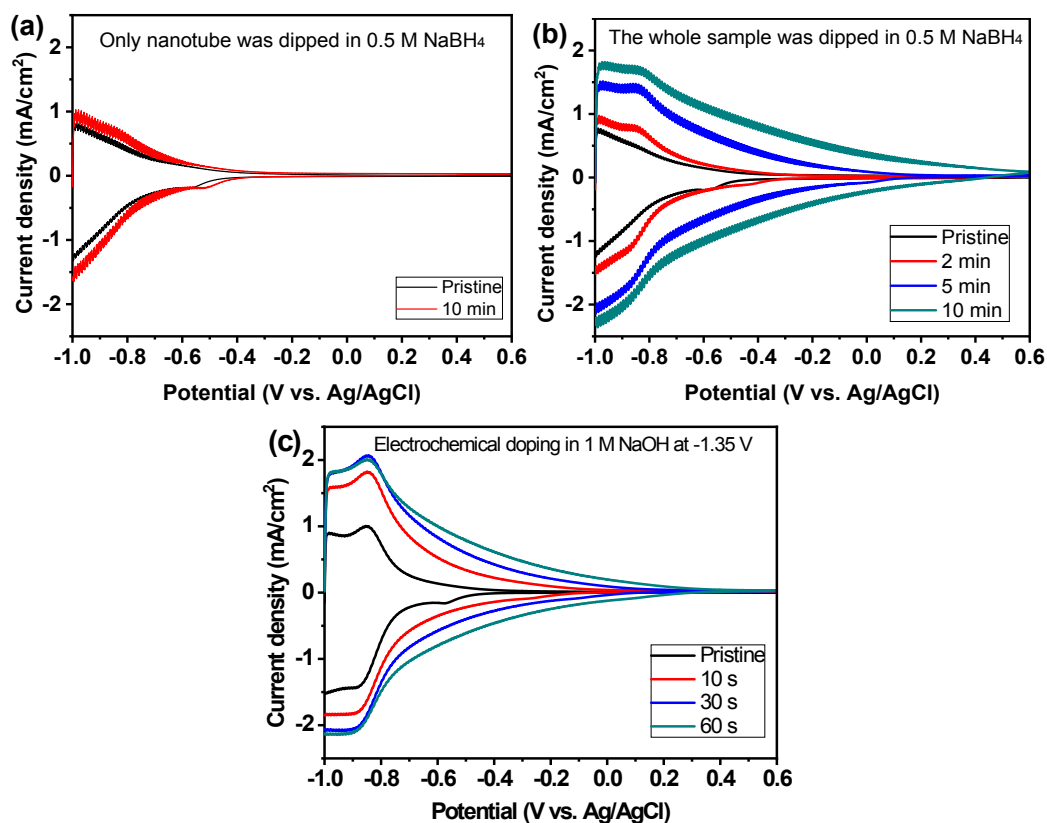

**Fig. S4** (a) Cyclic voltammetry (CV) curves of the O-TiO<sub>2</sub> samples before and after NaBH<sub>4</sub> treatment for 10 min. (b) CV curves of the W-TiO<sub>2</sub> samples before and after NaBH<sub>4</sub> treatment for 2, 5, and 10 min. (c) CV curves of the samples before and after electrochemical doping in aqueous 1 M NaOH at -1.35 V for 10, 30, and 60 s. Scan rate: 500 mV s<sup>-1</sup>. We can find that after NaBH<sub>4</sub> treatment the CV curves for W-TiO<sub>2</sub> are very similar with the TiO<sub>2</sub> nanotube array after electrochemical doping.

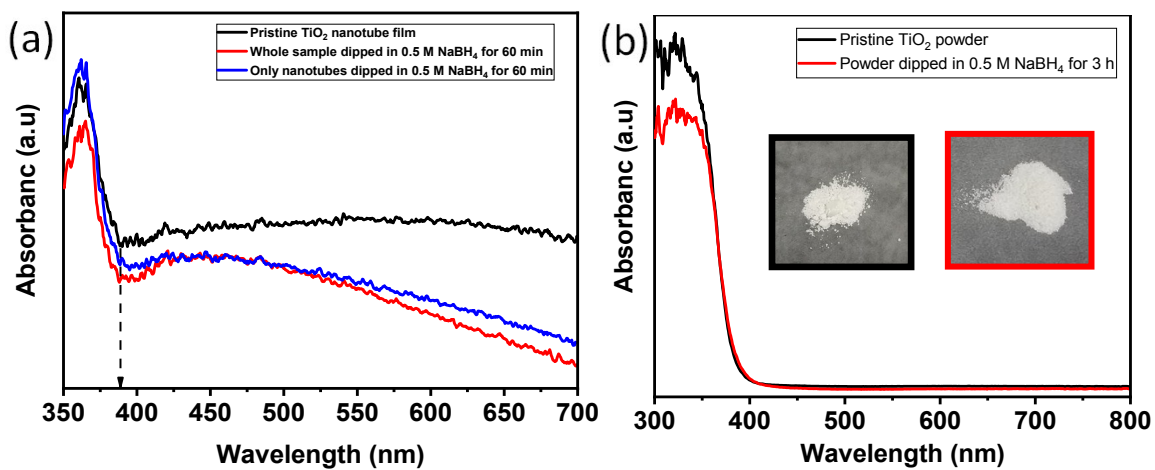

**Fig. S5** (a) The UV-visible diffuse reflection spectra of TiO<sub>2</sub> nanotube array before and after NaBH<sub>4</sub> treatment for 60 min of W-TiO<sub>2</sub> and O-TiO<sub>2</sub> electrodes. (b) The UV-visible diffuse reflection spectra of TiO<sub>2</sub> nanoparticles before and after NaBH<sub>4</sub> treatment for 3 h. Inset pictures were the photo of the samples.



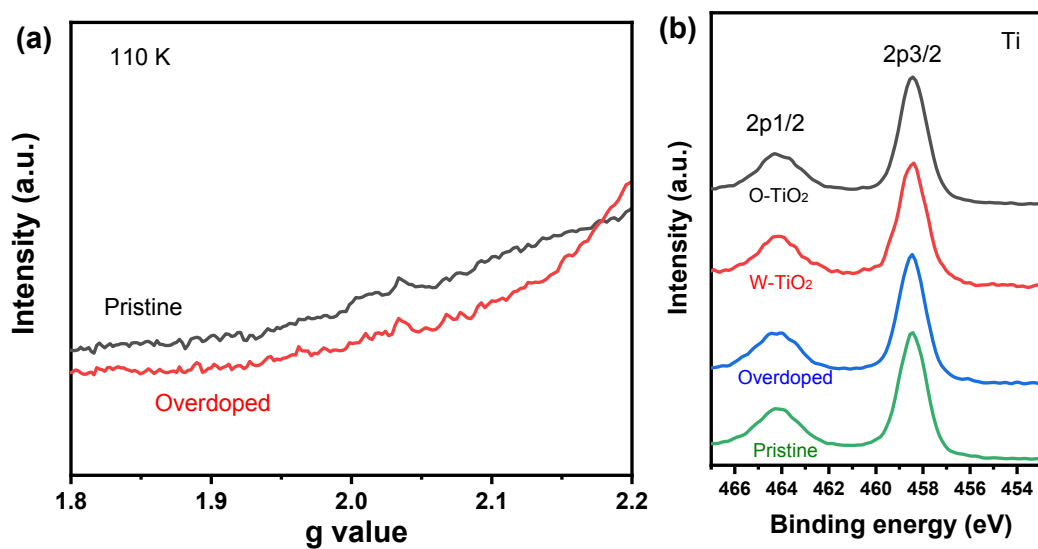

**Fig. S6** (a) EPR spectra for pristine and electrochemical overdoped TiO<sub>2</sub> nanotube photoanodes. (b) XPS spectra of Ti2p.

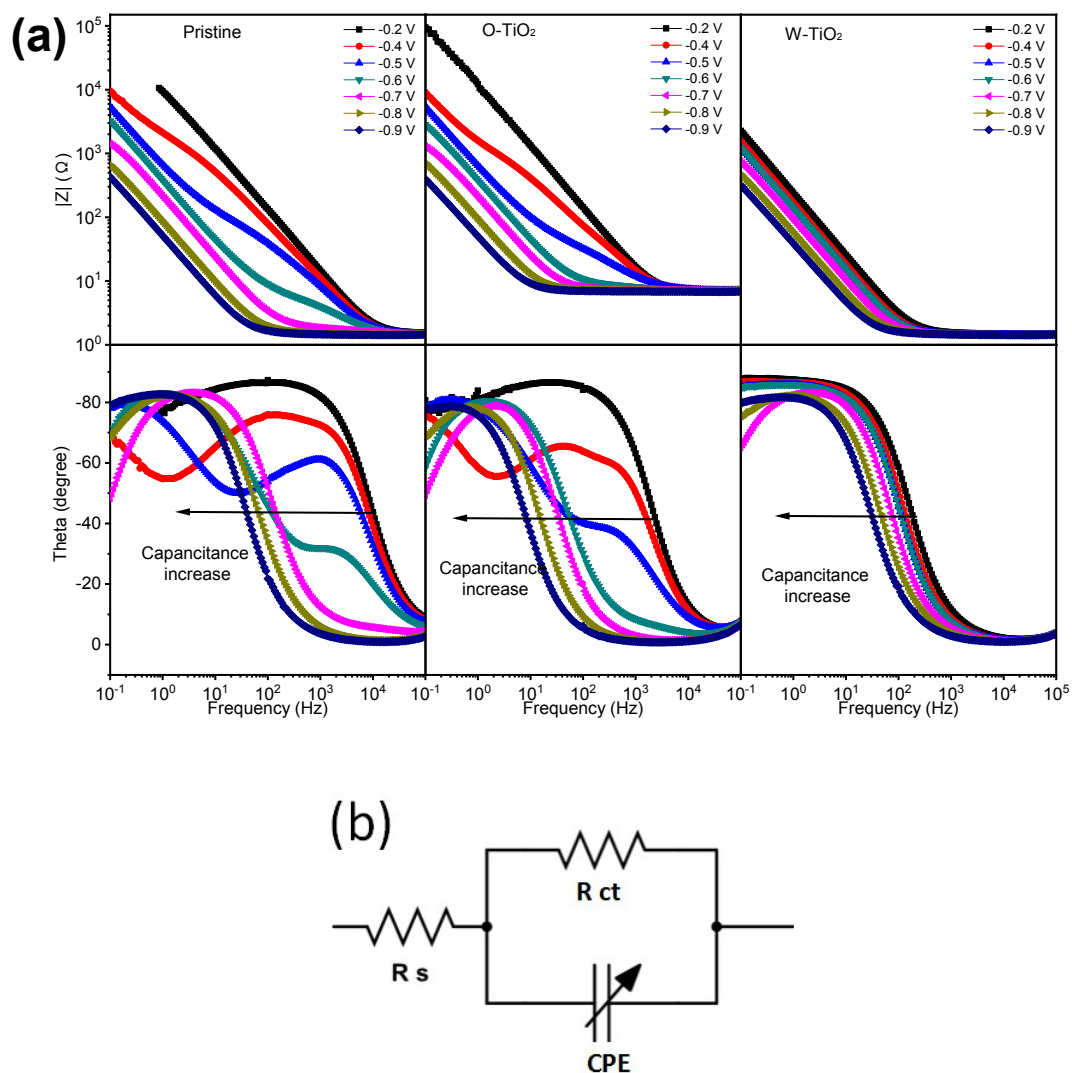

**Fig. S7.** Electrochemical impedance diagrams (Bode representation) of the as obtained (right), O-TiO<sub>2</sub> (mid) and W-TiO<sub>2</sub> (left) nanotube electrodes measured in 1 M NaOH in the dark. The active area of the samples was 0.28 cm<sup>2</sup> (b) Equivalent circuits used to simulate the EIS data.  $R_s$ : resistance from electrolyte and semiconductor- substrate electrical connection;  $R_{ct}$ : interfacial charge transfer resistance between semiconductor and electrolyte; CPE: capacitance for space charge layer or surface states of TiO<sub>2</sub> nanotube electrode.

For the pristine and O-TiO<sub>2</sub> when at the potential positive to -0.5 V vs. Ag/AgCl the capacitance decreases dramatically. Because at this potential charges in the surface states and nanotube walls were fully depleted which could not respond to the electrical signal. In addition, for W-TiO<sub>2</sub> nanotube electrodes charges in surface states and nanotube walls were not depleted

at the potential window we used because the high surface states density formed by electrochemical doping induced by the galvanic cell reaction during NaBH<sub>4</sub> treatment. The result is consistent with the M-S and CV results. So, we believe abundant surface states formed on W-TiO<sub>2</sub> *via* an electrochemical doping reaction induce by a galvanic cell reaction during NaBH<sub>4</sub> treatment.

Fitting parameters of EIS data obtained by using the equivalent circuit proposed in **Fig. S7**

| Samples                                | Potential<br>(V vs. Ag/AgCl) | CPE                                  |      | R <sub>ct,bulk</sub><br>(KΩ) | R <sub>s</sub><br>(Ω) |
|----------------------------------------|------------------------------|--------------------------------------|------|------------------------------|-----------------------|
|                                        |                              | Q (μΩ <sup>-1</sup> s <sup>n</sup> ) | n    |                              |                       |
| Pristine TiO <sub>2</sub><br>nanotubes | -0.9                         | 3469                                 | 0.95 | 3.5                          | 1.4                   |
|                                        | -0.8                         | 2083                                 | 0.94 | 2.3                          | 1.5                   |
|                                        | -0.7                         | 825.9                                | 0.95 | 2.3                          | 1.7                   |
|                                        | -0.3                         | 38.0                                 | 0.88 | 46.8                         | 1.4                   |
|                                        | -0.2                         | 16.0                                 | 0.96 | 48.4                         | 1.5                   |
| O-TiO <sub>2</sub>                     | -0.9                         | 3714                                 | 0.93 | 3.6                          | 6.8                   |
|                                        | -0.8                         | 1916                                 | 0.94 | 2.3                          | 7.1                   |
|                                        | -0.7                         | 494.9                                | 0.92 | 7.6                          | 7.7                   |
|                                        | -0.3                         | 27.3                                 | 0.89 | 29.6                         | 6.6                   |
|                                        | -0.2                         | 13.6                                 | 0.97 | 74.2                         | 7.0                   |
| W-TiO <sub>2</sub>                     | -0.9                         | 4684                                 | 0.94 | 3.5                          | 1.4                   |
|                                        | -0.8                         | 3062                                 | 0.94 | 2.6                          | 1.4                   |
|                                        | -0.7                         | 1842                                 | 0.96 | 1.9                          | 1.4                   |
|                                        | -0.6                         | 1484                                 | 0.96 | 7.7                          | 1.5                   |
|                                        | -0.5                         | 1131                                 | 0.99 | 10.8                         | 1.5                   |
|                                        | -0.4                         | 934.3                                | 0.99 | 21.1                         | 1.5                   |
|                                        | -0.3                         | 770.1                                | 0.99 | 31.9                         | 1.5                   |
|                                        | -0.2                         | 657.9                                | 0.99 | 57.4                         | 1.5                   |

\*The active area of the samples was 0.28 cm<sup>2</sup>



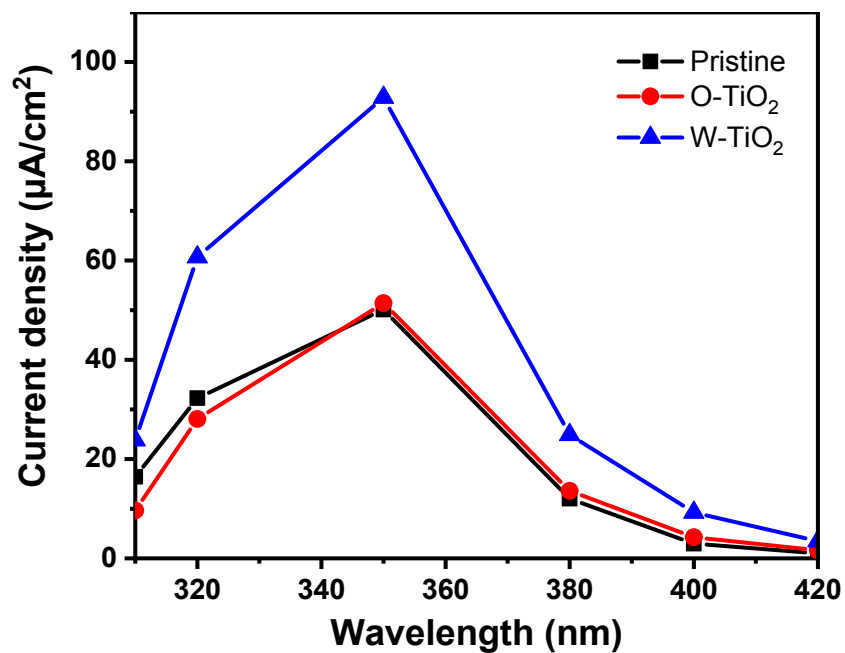

**Fig. S8** Under different monochromatic light irradiation, the photocurrents for pristine TiO<sub>2</sub> nanotube photoanodes, O-TiO<sub>2</sub> and W-TiO<sub>2</sub> photoanodes after 10 min NaBH<sub>4</sub> treatment. The increased current density was not come from the visible light contribution. After NaBH<sub>4</sub> treatment, the charge separation efficiency for W-TiO<sub>2</sub> photoanodes at the ultraviolet region increased dramatically comparing to O-TiO<sub>2</sub> photoanodes.

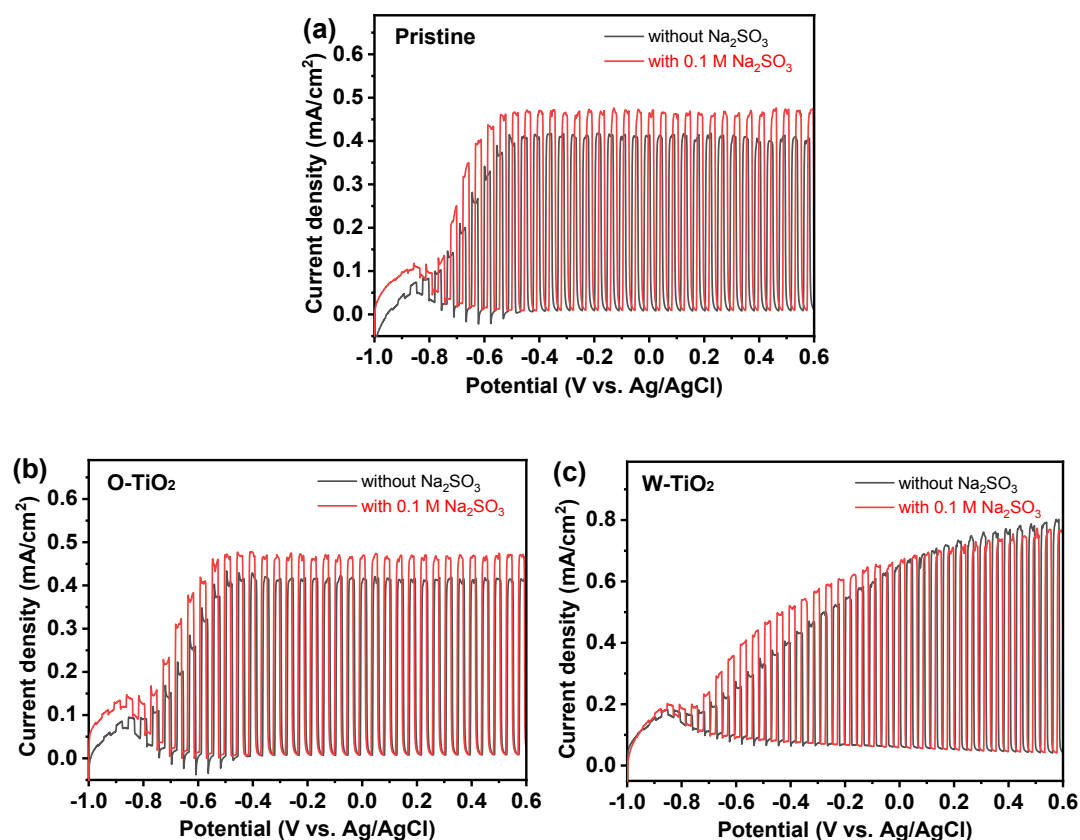

**Fig. S9.** Effect of sulfite ions on photocurrent density for TiO<sub>2</sub> nanotube electrodes (a) pristine TiO<sub>2</sub> nanotube photoanodes, (b) O-TiO<sub>2</sub> and (c) W-TiO<sub>2</sub> photoanodes after 10 min NaBH<sub>4</sub> treatment. A slight photocurrent difference was observed at the electrolyte with or without Na<sub>2</sub>SO<sub>3</sub> hole scavenger, indicating that NaBH<sub>4</sub> treatment does not change the OER kinetics. The increasing of charge separation efficiency was the reason of the enhanced photocurrent density for W-TiO<sub>2</sub> photoanodes.

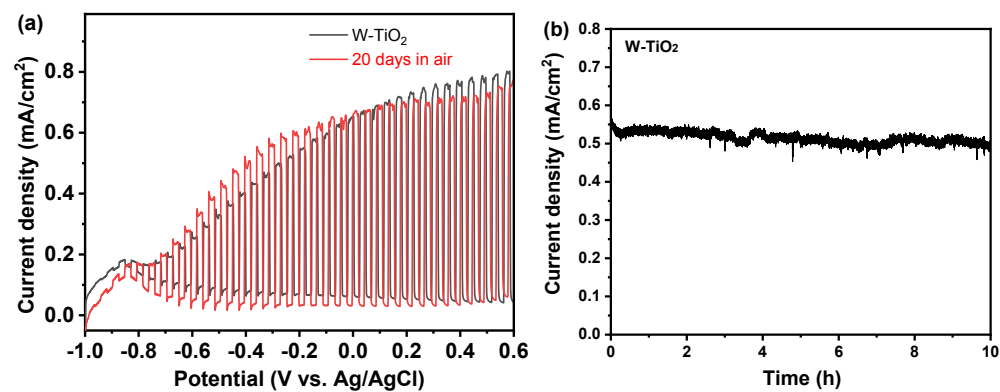

**Fig. S10** (a) Photocurrent density measured in 1 M NaOH for W-TiO<sub>2</sub> nanotube electrodes just after 10 min NaBH<sub>4</sub> treatment and the same photoanodes put in air for 20 days. (b) Chronoamperometry measurement for W-TiO<sub>2</sub> photoanode held at 0.2 V versus Ag/AgCl in NaOH for 10 h.

**References**

- 1 Q. Liu, J. He, T. Yao, Z. Sun, W. Cheng, S. He, Y. Xie, Y. Peng, H. Cheng, Y. Sun, Y. Jiang, F. Hu, Z. Xie, W. Yan, Z. Pan, Z. Wu and S. Wei, *Nat. Commun.*, 2014, **5**, 5122.
- 2 H. Zhu, M. Zhao, J. Zhou, W. Li, H. Wang, Z. Xu and L. Lu, *Appl. Catal. B Environ.*, 2018, **234**, 100–108.
